# Supplementary material for: Fermentative Production of Diacylglycerol by Endophytic Fungi Screened from Taxus chinensis var. mairei
Source: MDPI journal article supplement (doi:10.3390/foods12020399), 2023-01-14
Supplement: s1 [file s1]

# Fermentative Production of Diacylglycerol by Endophytic Fungi Screened from *Taxus chinensis* var. *mairei*

Wenqiang Xu <sup>a, b</sup>, Haoran Bi <sup>a, b</sup>, Hong Peng <sup>a, b\*</sup>, Ling Yang <sup>a, b</sup>, Hongwei He <sup>a, b</sup>,  
Guiming Fu <sup>a</sup>, Yuhuan Liu <sup>a, b</sup>, Yin Wan <sup>a</sup>

<sup>1</sup> State Key Laboratory of Food Science and Technology, Nanchang University, Nanchang, 330047, P R. China;

<sup>2</sup> Engineering Research Center of Biomass Conversion, Ministry of Education, Nanchang University, Nanchang, 330047, P R. China.

**Table S1.** Distribution of endophytic fungi in different tissues of *T. chinensis*.

| Tissues | Number of endophytic fungi strain | Percentage (%) |
|---------|-----------------------------------|----------------|
| Barks   | 7                                 | 18.42          |
| Leaves  | 9                                 | 23.68          |
| Stems   | 5                                 | 13.16          |
| Roots   | 17                                | 44.74          |

**Table S2.** CDW, crude lipid yield, and TLC results of lipid extracts after fermentation for 7 days at 28 °C with shaking speed of 120 rpm.

| Tissues | Code   | CDW (g/L) | Crude lipid yield (g/L) | TLC results of lipids |         |         |
|---------|--------|-----------|-------------------------|-----------------------|---------|---------|
|         |        |           |                         | TAG                   | 1,3-DAG | 1,2-DAG |
| Barks   | MLP1N1 | 9.06      | 1.40                    | *****                 | **      | **      |
|         | MLP12  | 4.82      | 1.69                    | *****                 | **      | **      |
|         | MLP21  | 7.39      | 0.79                    | *****                 | ***     | ***     |
|         | MLP22  | 2.75      | 0.88                    | *****                 | *       | ***     |
|         | MLP31  | 4.30      | 1.70                    | *****                 | -       | ***     |
|         | MLP32  | 8.09      | 1.27                    | *****                 | **      | ***     |
|         | MLP41  | 5.09      | 1.94                    | *****                 | *****   | *****   |
| Leaves  | MLY11  | 10.92     | 0.88                    | *****                 | *       | ***     |
|         | MLY23  | 9.88      | 1.45                    | *****                 | *****   | *****   |
|         | MLY32  | 7.23      | 0.890                   | *****                 | *****   | *       |
|         | MLY33  | 5.07      | 0.28                    | *****                 | ****    | -       |
|         | MLY41  | 2.26      | 0.12                    | *****                 | -       | -       |
|         | MLY42  | 6.47      | 0.49                    | *****                 | ****    | -       |
|         | MLY43  | 7.11      | 0.60                    | *****                 | **      | -       |
|         | MLY12W | 15.29     | 1.53                    | *****                 | ***     | -       |
|         | MLY31W | 9.57      | 1.43                    | *****                 | *****   | *****   |
| Stems   | MLJ11  | 6.90      | 0.58                    | *****                 | **      | *       |
|         | MLJ12  | 12.33     | 3.34                    | *****                 | -       | ***     |
|         | MLJ21  | 11.62     | 0.98                    | *****                 | **      | *_      |
|         | MLJ31  | 8.67      | 0.45                    | *****                 | ***     | *****   |
|         | MLJ33  | 6.12      | 0.40                    | *****                 | ***     | *****   |
| Roots   | MLG32W | 3.08      | 0.15                    | *****                 | *       | *****   |

|  |        |       |      |       |       |       |
|--|--------|-------|------|-------|-------|-------|
|  | MLG32Y | 4.14  | 0.13 | ***** | *     | ****  |
|  | MLG11  | 0.87  | 0.07 | ***** | *     | -     |
|  | MLG12  | 3.85  | 0.21 | ***** | *     | **    |
|  | MLG21  | 0.93  | 0.10 | ***** | *     | -     |
|  | MLG23  | 6.86  | 0.90 | ***** | ****  | ***** |
|  | MLG31  | 11.67 | 0.64 | ***** | -     | ****  |
|  | MLG32  | 8.44  | 0.83 | ***** | ****  | **    |
|  | MLG42  | 6.97  | 0.17 | ***** | *     | ***** |
|  | MLGP11 | 6.56  | 1.41 | ***** | ***** | ***** |
|  | MLGP12 | 3.65  | 0.79 | ***** | -     | -     |
|  | MLGP13 | 2.30  | 1.12 | ***** | -     | **    |
|  | MLGP23 | 7.07  | 1.44 | ***** | **    | **    |
|  | MLGP31 | 3.62  | 0.43 | ***** | **    | ****  |
|  | MLGP33 | 3.38  | 0.64 | ***** | **    | **    |
|  | MLGP41 | 0.39  | 0.12 | ***** | -     | -     |
|  | MLGP42 | 1.79  | 0.23 | ***** | *     | -     |

Note: “-” meaning that no TAG band or DAG band was observed; “\*” meaning that there was TAG band or DAG band observed, and there was more TAG or DAG was produced with the increase of number of “\*”.

**Table S3.** The sequencing and splicing results of the five endophytic fungi

| Code  | Sequencing and splicing results                                                                                                                                                                                                                                                                                                                                                                                                                                                                                                                                                                                                                                                                       |
|-------|-------------------------------------------------------------------------------------------------------------------------------------------------------------------------------------------------------------------------------------------------------------------------------------------------------------------------------------------------------------------------------------------------------------------------------------------------------------------------------------------------------------------------------------------------------------------------------------------------------------------------------------------------------------------------------------------------------|
| MLP41 | 1 ctgcggaggg atcattaccg agtttacaac tcccaaacc ctgtgaacat accaattgtt<br>61 gctcggcgg atcagccgc tcccggtaaa acgggacggc ccgccagagg acccctaacc<br>121 tctgttcta tatgtaact ctgagtaaaa ccataataa atcaaaact tcaacaacgg<br>181 atctcttgg tctggcatcg atgaagaacg cagcaaatg cgataagtaa tgtgaattgc<br>241 agaattcagt gaatcatcga atcttgaac gcacattgcg ccgccagta ttctggcggg<br>301 catgcctgtt cgagcgtcat ttcaaccctc aagccctcgg gtttggtgtt ggggatcggc<br>361 gagcccttgc ggcaagcgg ccccgaaatc tagtggcggg ctgcctgcag cttccattgc<br>421 gtagtagtaa aaccctcgca actggtacgc ggcgcggcca agccgtaaa ccccaactt<br>481 ctgaatgtg acctcggatc aggtaggaat acccgctgaa ctaagcata t                                                     |
| MLG23 | 1 gaggatcat taccgagttt acaactcca aaccaatgt gaaccatacc aaactgttgc<br>61 ctgcgggggg tcacgccccg ggtgcgtcgc agccccgga ccaggcgccc gccggaggga<br>121 ccaacaaaac tctttctgta gtccctcgc ggacgttatt tttacagct ctgagcaaaa<br>181 attcaaatg aatcaaaact ttcaacaacg gatctcttgg ttctggcatc gatgaagaac<br>241 gcagcgaaat gcgataagta atgtgaattg cagaattcag tgaatcatc aatctttgaa<br>301 cgcacattgc gcccgccagt attctggcgg gcatgcctgt ccgagcgtca ttcaaccct<br>361 cgaaccctc cgggggggtcg gcgttgggga tcgggaacce ctaagacggg atccccggcc<br>421 cgaaatacag tggcggctc gccgcagcct ctctgcgca gtagtttga caactcgac<br>481 cgggagcgcg gcgcgtccac gtccgtaaaa caccaactt tctgaatgt tgacctcgga<br>541 ttaggtagga ataccgctg aacttaagca ta |
| MLY23 | 1 tgcggaggga tcattactga gtttacgctc tataaccctt tgtgaacata cctataactg<br>61 ttgcttcggc gggtagggtc tccgcgacct tcccgctc ccgcctcgg gcgggtcggc                                                                                                                                                                                                                                                                                                                                                                                                                                                                                                                                                              |

|        |                                                                                                                                                                                                                                                                                                                                                                                                                                                                                                                                                                                                                                                                                                        |
|--------|--------------------------------------------------------------------------------------------------------------------------------------------------------------------------------------------------------------------------------------------------------------------------------------------------------------------------------------------------------------------------------------------------------------------------------------------------------------------------------------------------------------------------------------------------------------------------------------------------------------------------------------------------------------------------------------------------------|
|        | 121 gccgcgaggga ggataaccaa actctgattt aacgacgttt ctctgagtg gtacaagcaa<br>181 ataataaaaa ctttaacaa cggatctctt ggttctggca tcgatgaaga acgcagcgaa<br>241 atgcgataag taatgtgaat tgcagaattc agtgaatcat cgaatctttg aacgcacatt<br>301 gcgcccccca gcattctggc gggcatgcct gtccgagcgt catttcaacc ctcaagctct<br>361 gcttggtgtt ggggccctac agctgatgta ggccctcaaa ggtagtggcg gaccctcccg<br>421 gagctcctt tgcgtagtaa ctttacgtct cgcactggga tccggaggga ctcttgccgt<br>481 aaaaccccc aattttcaa aggttgacct cggatcaggt aggaataccc gctga                                                                                                                                                                                     |
| MLY31W | 1 tgcggaggga tcattataga gttttctaaa ctcccaacct atgtgaactt accattgttg<br>61 cctcggcaga agctacctgg ttaccttacc ttggaacggc ctacctgta gcgccttacc<br>121 ctggaacggc ctacctgta acggctgccg gtggactacc aaactctgt tattatattg<br>181 taatctgagc gtctatttt aataagtc aaacttcaac aacggatctc ttggttctgg<br>241 catcgatgaa gaacgcagcg aatgcgata agtaatgtga attgcagaat tcagtgaatc<br>301 atcgaatctt tgaacgcaca ttgcgccc atgtattcta gtgggcatgc ctgttcgagc<br>361 gtcatttcaa ccttaagcc tagcttagtg ttgggagcct actgctttg ctacggtag<br>421 ctctgaaat acaacggcgg atctgcgata tctctgagc gtagtaattt ttatctcgt<br>481 ttgactgga gttgcagcgt ctttagccgc taaaccccc aattttaat ggttgacctc<br>541 ggatcaggta ggaatacccg ctgaacttaa gcata |
| MLGP11 | 1 cttccgtag gtgaacctgc ggaaggatca ttaccgagtg agggccctct ggtccaacc<br>61 tcccaccgt gtttattcta cttgtgtgt tcggcgggccc cgcctcaccg ccgccggggg<br>121 gcaccgccc ccggggccgc gcccgcgaa gacaccattg aactctgtct gaagattgca<br>181 gtctgagcag attagctaaa tcagttaaaa ctttaacaa cggatctctt ggttccggca<br>241 tcgatgaaga acgcagcgaa atgcgataag taatgtgaat tgcagaattc agtgaatcat<br>301 cgagtctttg aacgcacatt gcgccccctg gtattccggg gggcatgcct gtccgagcgt<br>361 cattgtgcc ctcaagcacg gcttgtgtgt tgggcttcgc cccccggctc ccggggggcg<br>421 ggcccgaag gcagcggcgg caccgcgtcc ggtcctcgag cgtatggggc ttctcacc<br>481 gctctgtagg cccggccggc gcccgcggc gacccaatc aatctttca ggttgacctc<br>541 ggatcaggta gggatacccg c           |

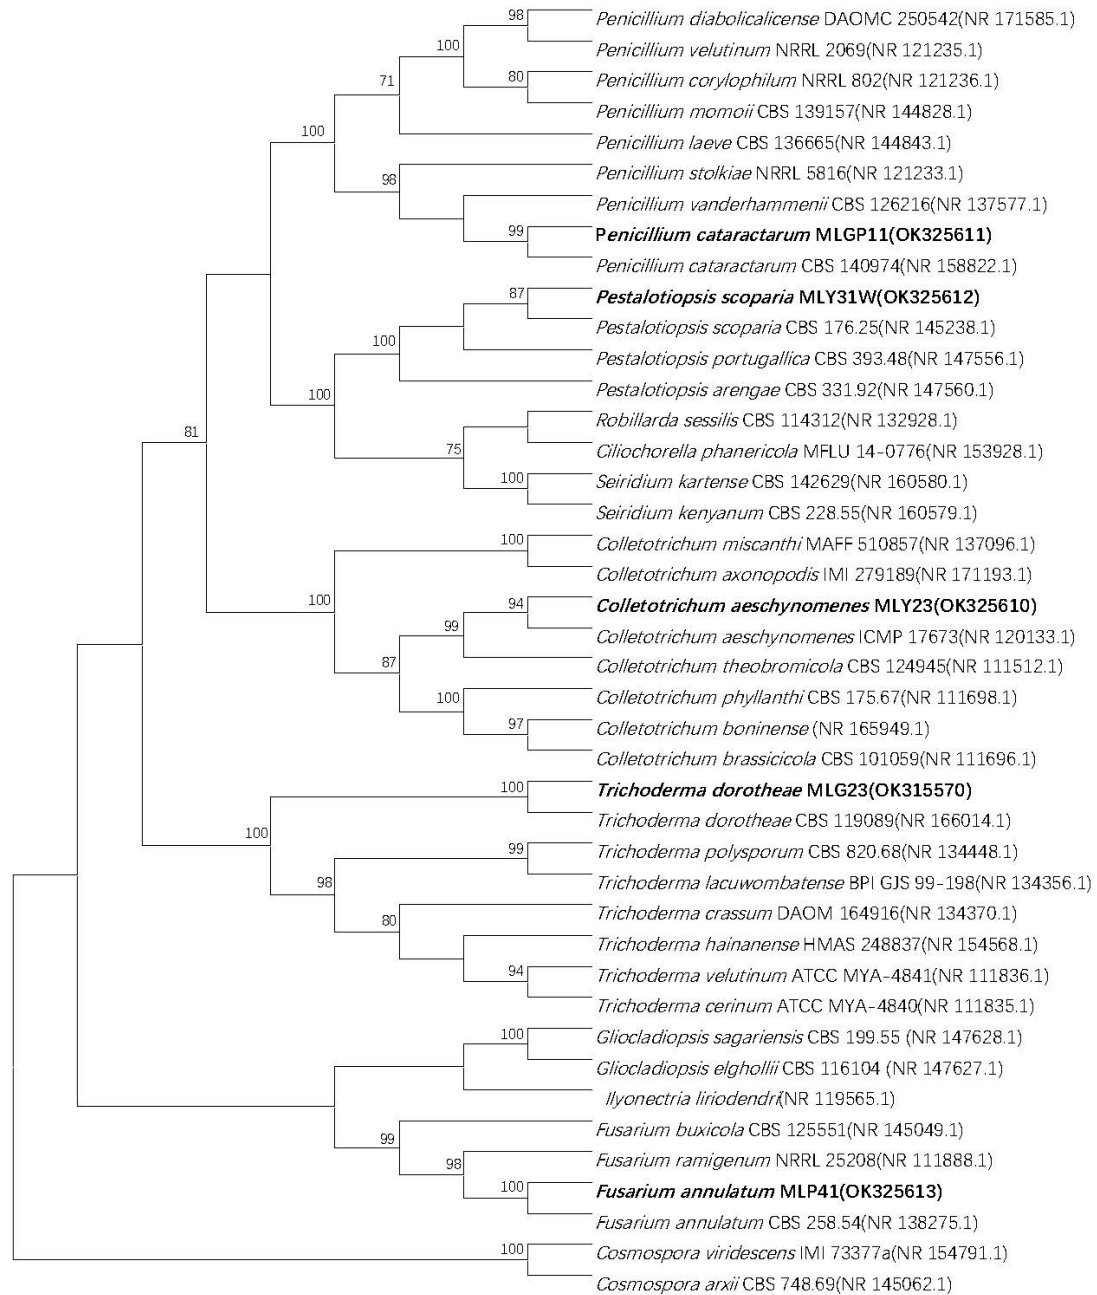

**Figure S1.** Phylogenetic tree of ITS sequences of endophytic fungi strains coded as MLP41, MLG23, MLY23, MLY31W, and MLGP11 (Gen Bank accession numbers of strains are in brackets).

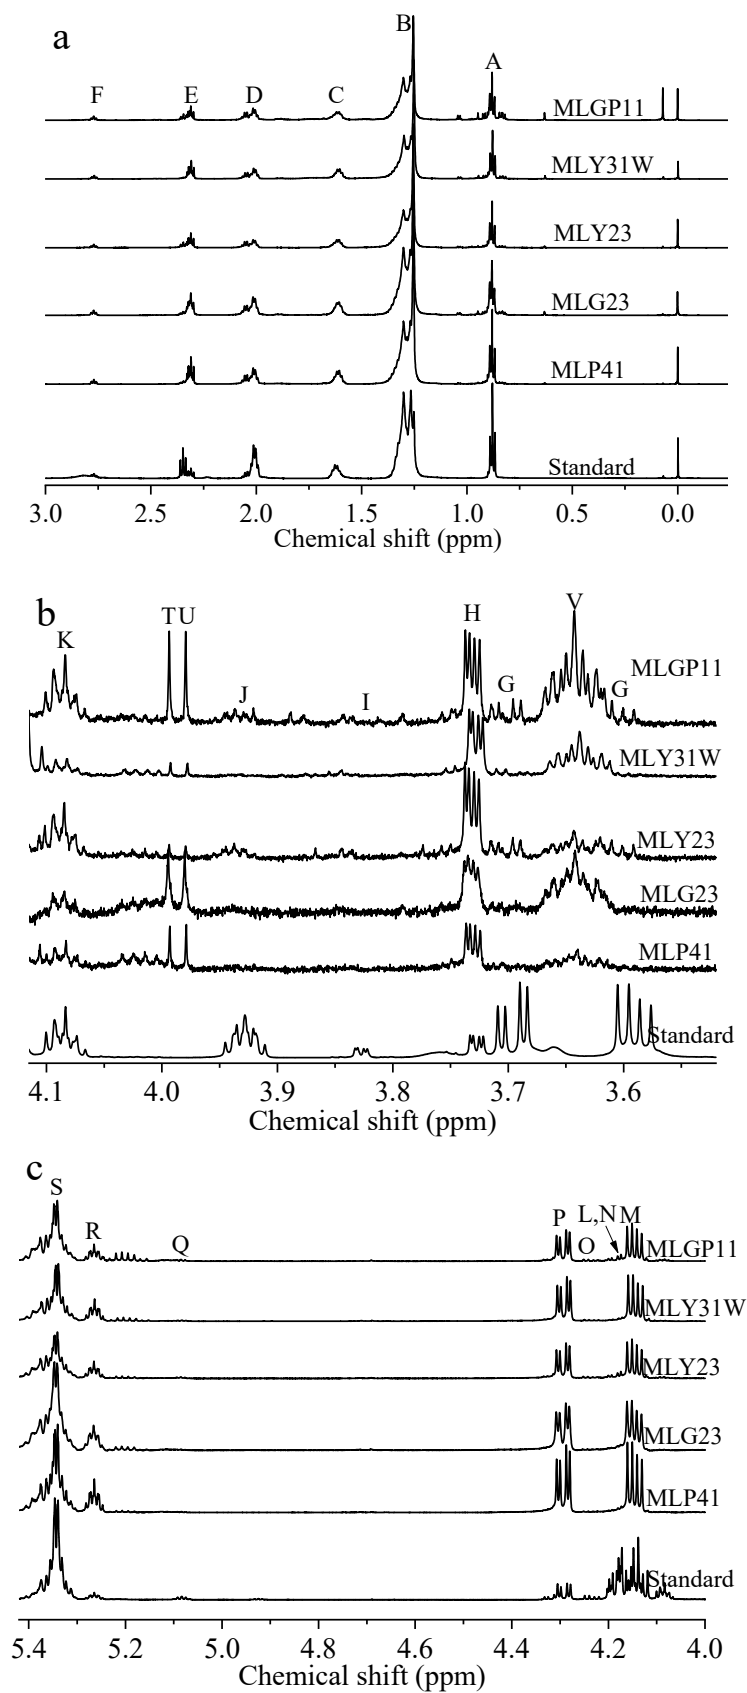

**Figure S2.**  $^1\text{H}$  NMR spectra of standards (containing TAG, 1,2-DAG, 1,3-DAG, and MAG) and lipids from MLP41, MLG23, MLY23, MLY31W, and MLGP11. (Solvent  $\text{CDCl}_3$ ).
